# Supplementary material
Source: publisher figshare collection journal article supplement (https://geolsoc.figshare.com/ndownloader/files/5427050)
Supplement: Supplementary file 1 [file 5427050]

	Signal Intensities (mV)				Concentrations (ppm)			2Ratios								Ages (Ma)							3% disc
Analysis	206Pb	207Pb	238U		Pb	U1		207Pb/206Pb	�1s %	206Pb/238U	�1s %	207Pb/235U	�1s %	Rho		207Pb/206Pb	�2s abs	206Pb/238U	�2s abs	207Pb/235U	�2s abs
106B_Z167	2.85	0.15	56.97		25	381		0.0565	0.8	0.0727	1.2	0.5664	1.4	0.84		473.1	17.3	452.3	10.4	455.7	10.4		4
106B_Z87	0.63	0.03	11.98		6	80		0.0574	3.1	0.0732	1.3	0.5794	3.3	0.38		507.8	67.8	455.3	11.1	464.1	24.5		2
106B_Z197	0.45	0.02	8.63		4	58		0.0588	3.4	0.0733	1.3	0.5945	3.6	0.35		560.3	74.1	456.1	11.1	473.8	27.1		4
106B_Z154	13.43	0.70	265.82		118	1777		0.0569	0.5	0.0735	1.6	0.5772	1.7	0.95		489.6	11.0	457.3	14.2	462.7	12.5		1
106B_Z48	2.86	0.15	54.34		25	363		0.0566	0.7	0.0741	1.0	0.5786	1.3	0.81		475.9	16.3	461.0	9.0	463.5	9.3		1
106B_Z64	1.59	0.08	30.56		14	204		0.0565	1.3	0.0742	1.1	0.5781	1.7	0.64		471.6	28.6	461.6	9.7	463.3	12.5		0
106B_Z164	1.18	0.06	22.39		10	150		0.0573	1.5	0.0744	1.4	0.5876	2.0	0.67		503.7	33.5	462.3	12.2	469.3	15.3		1
106B_Z49	2.80	0.15	53.55		25	358		0.0568	0.8	0.0744	1.2	0.5821	1.4	0.84		482.5	17.4	462.5	10.8	465.8	10.7		1
106B_Z99	0.89	0.05	16.93		8	113		0.0570	1.9	0.0746	1.0	0.5858	2.2	0.46		489.8	42.8	463.8	9.0	468.2	16.3		1
106B_Z102	0.54	0.03	10.25		5	69		0.0611	3.0	0.0748	1.4	0.6294	3.3	0.41		641.5	65.5	464.7	12.3	495.7	25.9		6
106B_Z136	0.71	0.04	13.54		6	91		0.0582	2.4	0.0748	1.2	0.5997	2.7	0.44		536.8	53.0	464.7	10.7	477.1	20.4		3
106B_Z46	1.18	0.06	22.33		10	149		0.0591	1.4	0.0749	1.0	0.6099	1.8	0.58		570.7	31.5	465.3	9.3	483.5	13.6		4
106B_Z27	0.97	0.05	17.96		9	120		0.0616	1.9	0.0749	1.4	0.6355	2.4	0.58		658.7	41.4	465.4	12.4	499.5	18.6		7
106B_Z172	0.81	0.06	15.41		7	103		0.0700	5.2	0.0749	1.7	0.7224	5.5	0.31		927.4	107.4	465.5	15.6	552.1	45.9		16
106B_Z55	2.66	0.14	49.94		23	334		0.0568	0.8	0.0749	1.1	0.5863	1.3	0.82		483.1	16.9	465.5	9.8	468.5	10.0		1
106B_Z177	1.59	0.08	29.32		14	196		0.0579	1.3	0.0749	1.8	0.5986	2.3	0.81		526.8	28.9	465.9	16.6	476.3	17.1		2
106B_Z168	0.85	0.05	16.02		7	107		0.0612	1.9	0.0751	1.5	0.6343	2.4	0.61		647.4	41.2	467.0	13.4	498.8	19.0		6
106B_Z119	0.59	0.03	11.17		5	75		0.0608	3.6	0.0752	1.4	0.6296	3.8	0.36		630.9	77.0	467.1	12.2	495.9	29.6		6
106B_Z205	0.93	0.05	18.00		8	120		0.0605	1.8	0.0753	1.4	0.6277	2.3	0.62		621.1	38.5	467.8	12.9	494.7	17.7		5
106B_Z143	7.37	0.38	139.88		65	935		0.0564	0.5	0.0753	1.3	0.5855	1.4	0.94		467.2	11.1	468.1	12.1	468.0	10.7		0
106B_Z79	0.82	0.05	15.51		7	104		0.0605	2.4	0.0754	1.1	0.6288	2.6	0.43		622.1	51.5	468.4	10.3	495.4	20.6		5
106B_Z133	0.30	0.02	5.87		3	39		0.0613	5.1	0.0754	1.1	0.6367	5.2	0.21		648.9	109.2	468.4	9.9	500.3	40.3		6
106B_Z39	1.44	0.08	26.63		13	178		0.0588	1.3	0.0754	1.5	0.6111	2.0	0.74		559.2	28.9	468.6	13.2	484.3	15.1		3
106B_Z88	0.60	0.03	11.22		5	75		0.0607	3.8	0.0754	1.3	0.6313	4.0	0.32		628.9	82.6	468.7	11.6	496.9	31.3		6
106B_Z194	2.85	0.15	54.21		25	362		0.0569	0.8	0.0757	1.7	0.5934	1.9	0.90		487.2	17.9	470.1	15.6	473.0	14.3		1
106B_Z128	0.31	0.02	5.87		3	39		0.0563	5.9	0.0760	1.0	0.5904	6.0	0.17		465.8	131.2	472.2	9.4	471.1	44.4		0
106B_Z58	2.24	0.12	41.95		20	280		0.0575	0.8	0.0761	1.0	0.6034	1.3	0.77		510.2	18.7	473.0	9.2	479.4	10.1		1
106B_Z53	1.74	0.09	33.38		15	223		0.0586	1.2	0.0763	1.0	0.6166	1.6	0.64		553.0	27.0	474.0	9.5	487.7	12.5		3
106B_Z6	0.96	0.05	17.25		8	115		0.0580	1.8	0.0764	1.1	0.6105	2.1	0.50		528.9	40.0	474.5	9.6	483.9	16.1		2
106B_Z140_2	0.53	0.03	10.00		5	67		0.0588	2.9	0.0764	1.0	0.6191	3.0	0.33		558.3	62.4	474.6	9.0	489.3	23.3		3
106B_Z81	1.06	0.05	19.36		9	129		0.0568	1.7	0.0764	1.0	0.5984	2.0	0.53		483.5	36.8	474.7	9.6	476.2	14.8		0
106B_Z11	4.24	0.22	75.71		37	506		0.0575	0.6	0.0768	1.4	0.6087	1.5	0.92		510.8	12.8	476.8	12.6	482.7	11.4		1
106B_Z84_2	0.92	0.05	17.43		8	116		0.0592	1.8	0.0769	0.9	0.6273	2.1	0.46		574.4	39.9	477.3	8.7	494.4	16.0		3
106B_Z23	0.47	0.02	8.59		4	57		0.0572	3.2	0.0769	1.0	0.6067	3.4	0.29		499.8	71.4	477.7	9.0	481.5	25.6		1
106B_Z89	1.66	0.09	30.41		15	203		0.0606	2.4	0.0770	2.8	0.6432	3.6	0.76		625.7	50.9	477.9	25.4	504.3	28.5		5
106B_Z138_2	0.81	0.05	14.59		7	98		0.0653	5.0	0.0770	1.0	0.6932	5.2	0.20		784.3	106.0	478.1	9.5	534.7	41.9		11
106B_Z209	1.48	0.08	27.84		13	186		0.0601	1.2	0.0770	1.8	0.6387	2.2	0.84		608.9	25.3	478.3	16.7	501.5	16.9		5
106B_Z209_2	0.41	0.02	7.76		4	52		0.0597	3.5	0.0771	1.0	0.6339	3.6	0.27		591.3	75.9	478.5	9.1	498.5	28.3		4
106B_Z186_2	1.69	0.09	31.93		15	213		0.0578	1.1	0.0772	1.0	0.6155	1.5	0.68		524.0	23.5	479.2	9.1	487.0	11.2		2
106B_Z43	0.62	0.04	11.35		5	76		0.0621	2.6	0.0773	1.4	0.6622	3.0	0.48		679.2	55.4	479.9	13.2	516.0	23.7		7
106B_Z40	0.88	0.05	16.21		8	108		0.0652	1.8	0.0774	1.2	0.6952	2.1	0.54		779.4	38.0	480.5	10.7	535.9	17.7		10
106B_Z185_2	1.02	0.05	19.14		9	128		0.0572	1.6	0.0774	1.1	0.6104	1.9	0.54		499.5	35.6	480.5	9.7	483.8	14.7		1
106B_Z2	0.86	0.04	15.30		8	102		0.0561	1.9	0.0774	1.0	0.5985	2.2	0.45		455.8	43.0	480.6	9.0	476.3	16.4		-1
106B_Z20	4.18	0.22	76.87		37	514		0.0580	0.5	0.0775	1.2	0.6199	1.3	0.91		530.8	11.6	481.0	10.8	489.8	9.9		9
106B_Z103	1.01	0.06	18.53		9	124		0.0652	1.7	0.0775	1.8	0.6968	2.5	0.73		781.3	35.6	481.1	16.7	536.9	20.4		10
106B_Z136_2	0.29	0.02	5.49		3	37		0.0582	4.8	0.0777	1.1	0.6236	4.9	0.23		537.3	104.1	482.4	10.3	492.1	37.4		2
106B_Z17	0.97	0.05	18.01		9	120		0.0564	1.8	0.0777	1.1	0.6047	2.1	0.54		469.4	39.3	482.5	10.7	480.2	16.1		-3
106B_Z47	4.89	0.25	89.46		43	598		0.0575	0.5	0.0777	1.4	0.6165	1.5	0.94		511.4	11.0	482.6	12.9	487.6	11.4		1
106B_Z147_2	0.86	0.05	15.94		8	107		0.0592	1.9	0.0778	1.2	0.6349	2.2	0.54		575.1	40.4	482.8	10.9	499.2	17.2		3
106B_Z133_2	0.45	0.02	8.24		4	55		0.0583	3.3	0.0779	1.0	0.6264	3.4	0.31		541.0	71.2	483.7	9.8	493.8	26.4		2
106B_Z105	0.69	0.04	12.71		6	85		0.0590	2.4	0.0781	1.1	0.6347	2.6	0.41		565.7	51.5	484.6	10.0	499.0	20.3		3
106B_Z123	0.56	0.03	10.17		5	68		0.0620	3.3	0.0783	1.1	0.6692	3.5	0.33		673.4	71.1	486.0	10.7	520.2	28.2		7
106B_Z175	0.83	0.05	14.85		7	99		0.0696	3.9	0.0785	1.4	0.7538	4.2	0.34		917.8	81.1	487.2	13.3	570.4	36.0		15
106B_Z107	1.22	0.06	22.33		11	149		0.0557	1.4	0.0785	1.0	0.6025	1.8	0.59		438.7	31.7	487.3	9.7	478.8	13.3		-2
106B_Z200	0.88	0.05	16.32		8	109		0.0613	2.5	0.0786	2.1	0.6640	3.3	0.65		649.6	53.2	487.6	19.9	517.1	26.1		6
106B_Z9	1.52	0.08	26.97		13	180		0.0564	1.2	0.0786	1.4	0.6114	1.8	0.76		469.2	25.8	487.7	12.7	484.5	13.7		-1
106B_Z85_2	0.88	0.05	16.32		8	109		0.0592	1.8	0.0788	1.0	0.6432	2.1	0.48		574.5	39.3	489.0	9.3	504.3	16.3		3
106B_Z13	1.13	0.06	19.94		10	133		0.0606	1.4	0.0789	1.0	0.6592	1.8	0.58		624.2	30.9	489.7	9.6	514.1	14.1		5
106B_Z152_2	1.05	0.06	18.93		9	126		0.0624	1.7	0.0791	1.1	0.6813	2.1	0.53		689.3	37.1	490.9	10.4	527.6	16.8		7
106B_Z180	2.01	0.11	35.67		18	238		0.0615	1.2	0.0793	1.3	0.6724	1.7	0.71		656.0	26.2	492.1	11.8	522.2	14.2		6
106B_Z173	1.48	0.10	26.47		13	177		0.0729	1.6	0.0795	1.7	0.7997	2.3	0.71		1011.8	33.4	493.4	15.8	596.7	20.9		51
106B_Z192	0.68	0.06	12.20		6	82		0.0980	13.3	0.0795	1.9	1.0751	13.5	0.14		1586.9	249.2	493.4	17.8	741.3	132.6		69
106B_Z96	0.76	0.05	13.63		7	91		0.0670	2.5	0.0799	1.1	0.7383	2.8	0.41		837.8	52.7	495.6	10.8	561.4	23.6		12
106B_Z138	1.20	0.08	21.34		11	143		0.0661	3.4	0.0802	1.4	0.7306	3.7	0.38		808.7	70.8	497.3	13.3	556.9	30.9		11
106B_Z65	1.36	0.08	24.18		12	162		0.0641	1.6	0.0803	1.1	0.7094	1.9	0.56		744.9	33.0	497.7	10.1	544.4	15.8		9
106B_Z140	1.34	0.07	23.80		12	159		0.0612	2.2	0.0803	1.1	0.6768	2.4	0.44		644.9	46.3	497.7	10.1	524.9	19.5		5
106B_Z145_2	1.08	0.06	19.33		9	129		0.0623	1.5	0.0803	1.0	0.6901	1.8	0.57		685.3	32.3	498.0	9.9	532.9	15.1		7
106B_Z193	1.62	0.09	28.76		14	192		0.0639	1.1	0.0805	1.2	0.7099	1.7	0.74		739.7	23.4	499.3	11.8	544.7	13.9		8
106B_Z193_2	0.97	0.05	18.09		9	121		0.0604	1.6	0.0806	1.0	0.6719	1.9	0.51		619.5	35.2	499.8	9.2	521.9	15.3		4
106B_Z170	1.21	0.08	21.47		11	144		0.0710	3.0	0.0807	1.4	0.7900	3.4	0.42		958.1	62.3	500.1	13.6	591.2	29.7		15
106B_Z185	1.70	0.10	29.94		15	200		0.0609	1.2	0.0808	1.1	0.6780	1.6	0.70		634.4	24.8	500.9	10.8	525.6	13.1		5
106B_Z12	0.49	0.03	8.41		4	56		0.0689	2.7	0.0812	1.1	0.7715	2.9	0.39		896.9	54.7	503.1	10.9	580.6	25.1		13
106B_Z146	0.92	0.06	16.04		8	107		0.0714	2.9	0.0815	1.0	0.8028	3.1	0.33		969.8	58.9	505.1	9.7	598.4	27.3		16
106B_Z182_2	0.89	0.05	15.50		8	104		0.0622	2.9	0.0817	1.2	0.7008	3.2	0.39		680.3	62.3	506.5	12.1	539.2	26.2		6
106B_Z22	10.42	0.55	179.77		92	1202		0.0576	0.5	0.0818	1.0	0.6493	1.2	0.90		514.5	11.0	506.6	10.1	508.0	9.2		0
106B_Z26	10.25	0.54	178.72		90	1195		0.0576	0.5	0.0818	1.5	0.6489	1.6	0.95		512.7	11.0	506.7	14.3	507.8	12.4		0
106B_Z3	0.83	0.07	14.17		7	95		0.0869	3.8	0.0818	1.1	0.9806	3.9	0.27		1358.5	73.3	507.1	10.3	693.9	38.9		63
106B_Z85	5.43	0.30	91.53		48	612		0.0601	0.5	0.0820	1.2	0.6802	1.3	0.92		608.0	10.8	508.3	11.8	526.9	10.7		4
106B_Z106	0.65	0.06	11.00		6	74		0.1041	7.2	0.0822	1.5	1.1798	7.4	0.21		1699.0	133.4	509.1	14.9	791.2	78.3		70
106B_Z169	0.56	0.04	9.54		5	64		0.0849	2.4	0.0822	1.0	0.9626	2.6	0.38		1314.4	47.4	509.2	9.9	684.7	26.0		61
106B_Z207	10.95	0.58	192.54		96	1287		0.0577	0.5	0.0823	1.5	0.6549	1.6	0.95		518.3	11.0	510.0	14.7	511.5	12.6		0
106B_Z122	3.05	0.17	52.37		27	350		0.0623	0.8	0.0835	1.0	0.7182	1.2	0.79		685.9	16.3	517.3	9.7	549.6	10.4		6
106B_Z190	2.65	0.16	44.20		23	295		0.0643	1.3	0.0841	1.1	0.7458	1.7	0.64		751.6	27.0	520.6	10.7	565.8	14.4		8
106B_Z37	1.73	0.12	28.74		15	192		0.0765	1.6	0.0842	1.4	0.8883	2.2	0.66		1108.5	32.5	521.2	14.4	645.5	20.5		53
106B_Z201	0.68	0.05	11.49		6	77		0.0792	6.4	0.0847	2.2	0.9252	6.8	0.33		1177.5	127.1	524.2	22.2	665.1	64.2		55
106B_Z186	1.54	0.09	25.71		14	172		0.0627	1.8	0.0849	1.3	0.7342	2.3	0.58		699.3	39.1	525.2	13.3	559.0	19.3		6
106B_Z24	0.58	0.04	9.61		5	64		0.0822	5.7	0.0849	2.9	0.9619	6.4	0.45		1249.3	111.2	525.4	28.8	684.3	61.5		58
106B_Z163	5.23	0.30	87.07		46	582		0.0625	0.6	0.0863	1.2	0.7437	1.3	0.90		692.3	12.3	533.4	12.2	564.6	11.4		6
106B_Z147	2.30	0.14	38.30		20	256		0.0693	1.6	0.0877	1.2	0.8379	2.0	0.59		907.6	32.4	541.9	12.0	618.0	17.9		12
106B_Z152	3.88	0.23	62.92		34	421		0.0652	0.9	0.0883	1.1	0.7938	1.4	0.77		781.9	19.3	545.2	11.6	593.3	12.9		8
106B_Z162	4.24	0.27	67.50		37	451		0.0687	0.9	0.0904	1.3	0.8558	1.6	0.82		889.5	18.9	557.7	14.0	627.8	14.8		11
106B_Z66	0.64	0.06	9.83		6	66		0.0948	1.7	0.0920	1.3	1.2029	2.2	0.60		1524.8	32.9	567.3	14.2	801.9	23.9		63
106B_Z148	0.58	0.05	9.03		5	60		0.1040	4.4	0.0934	3.8	1.3385	5.8	0.65		1696.1	81.7	575.5	41.2	862.6	65.4		66
106B_Z21	0.90	0.06	12.95		8	87		0.0711	1.8	0.0993	1.0	0.9739	2.0	0.47		961.7	36.7	610.2	11.3	690.5	20.2		12
106B_Z72	6.48	0.39	89.27		57	597		0.0664	2.3	0.1031	1.1	0.9443	2.5	0.42		819.1	47.5	632.8	12.8	675.1	24.5		23
106B_Z202	2.61	0.18	37.84		23	253		0.0758	4.1	0.1054	4.9	1.1006	6.4	0.77		1088.6	82.8	645.8	60.3	753.6	66.2		41
106B_Z117	0.41	0.04	4.97		4	33		0.1047	3.8	0.1180	1.9	1.7038	4.2	0.44		1709.5	69.8	719.0	25.2	1010.0	52.7		58
106B_Z94	1.85	0.16	19.46		16	130		0.0937	3.4	0.1312	1.2	1.6949	3.6	0.33		1501.8	63.6	794.8	17.9	1006.6	44.6		47
106B_Z121	1.48	0.10	15.57		13	104		0.0712	1.1	0.1353	1.3	1.3278	1.7	0.75		963.2	22.9	817.8	19.6	857.9	19.5		5
106B_Z101	1.20	0.14	12.59		11	84		0.1253	1.7	0.1380	3.2	2.3855	3.7	0.89		2033.7	29.5	833.5	50.6	1238.3	51.0		59
106B_Z67	4.12	0.26	39.92		36	267		0.0684	0.7	0.1469	1.0	1.3847	1.2	0.82		880.0	14.1	883.4	16.0	882.4	13.9		0
106B_Z129	2.46	0.17	21.68		22	145		0.0765	1.2	0.1623	1.3	1.7127	1.8	0.72		1109.1	24.9	969.6	23.5	1013.3	22.9		13
106B_Z112	5.59	0.38	48.54		49	324		0.0746	0.5	0.1640	1.3	1.6862	1.4	0.93		1056.9	10.1	979.0	22.8	1003.3	17.1		7
106B_Z97	5.65	0.38	47.25		50	316		0.0732	0.5	0.1692	1.0	1.7072	1.1	0.89		1019.3	10.1	1007.5	17.9	1011.2	13.8		1
106B_Z83	4.72	0.32	39.73		41	266		0.0732	0.5	0.1725	1.8	1.7415	1.8	0.96		1019.8	10.1	1026.0	33.4	1024.0	23.4		-1
106B_Z178	5.73	0.39	48.71		50	326		0.0736	0.5	0.1681	1.6	1.7061	1.6	0.95		1030.8	10.1	1001.6	28.7	1010.8	20.7		3
106B_Z41	6.72	0.46	54.44		59	364		0.0747	0.5	0.1752	1.0	1.8034	1.1	0.89		1059.8	10.1	1040.4	19.2	1046.7	14.5		2
106B_Z50	2.82	0.19	22.66		25	151		0.0749	0.6	0.1763	1.0	1.8194	1.2	0.87		1064.5	11.7	1046.7	19.4	1052.5	15.1		2
106B_Z124	1.35	0.09	11.23		12	75		0.0751	1.1	0.1770	1.2	1.8323	1.6	0.73		1070.3	22.5	1050.7	22.8	1057.1	21.1		2
106B_Z90	3.31	0.22	27.36		29	183		0.0753	0.5	0.1740	1.9	1.8067	1.9	0.97		1076.1	10.0	1034.4	35.3	1047.9	24.8		4
106B_Z156	1.84	0.13	15.31		16	102		0.0755	0.8	0.1713	1.5	1.7844	1.7	0.89		1083.1	16.0	1019.3	28.9	1039.8	22.2		6
106B_Z42	2.97	0.21	23.45		26	157		0.0756	0.6	0.1806	1.0	1.8819	1.2	0.86		1084.3	11.9	1070.0	20.0	1074.7	15.5		1
106B_Z141	4.01	0.28	32.13		35	215		0.0757	0.5	0.1774	1.0	1.8511	1.1	0.89		1086.6	10.0	1052.7	19.3	1063.8	14.6		3
106B_Z14	7.34	0.51	56.19		65	376		0.0758	0.5	0.1827	1.1	1.9099	1.2	0.91		1090.5	10.0	1081.6	21.9	1084.5	16.0		1
106B_Z80	1.88	0.13	15.36		16	103		0.0760	0.9	0.1735	1.1	1.8179	1.4	0.78		1095.1	17.7	1031.2	21.3	1051.9	18.5		6
106B_Z166	12.57	0.87	96.32		110	644		0.0762	0.5	0.1858	1.3	1.9524	1.4	0.94		1100.5	10.0	1098.6	27.0	1099.3	19.0		0
106B_Z196	2.78	0.19	22.75		24	152		0.0764	0.6	0.1746	1.1	1.8382	1.3	0.88		1104.3	12.3	1037.5	22.0	1059.2	17.0		6
106B_Z125	0.20	0.01	1.59		2	11		0.0767	6.3	0.1758	1.4	1.8603	6.5	0.21		1114.5	126.0	1044.1	26.5	1067.1	82.0		6
106B_Z191	4.26	0.30	34.59		37	231		0.0769	0.5	0.1768	1.4	1.8736	1.5	0.94		1117.9	10.4	1049.3	26.5	1071.8	19.3		6
106B_Z158	6.25	0.44	48.29		55	323		0.0771	0.5	0.1853	1.2	1.9706	1.3	0.92		1124.7	10.0	1095.7	23.3	1105.5	16.9		3
106B_Z108	0.88	0.06	6.80		8	45		0.0774	1.6	0.1867	1.0	1.9931	1.9	0.53		1132.4	31.8	1103.4	20.5	1113.2	25.3		3
106B_Z144	0.97	0.07	7.60		8	51		0.0780	1.6	0.1735	1.1	1.8657	1.9	0.57		1146.2	31.4	1031.6	20.7	1069.0	25.0		10
106B_Z71	2.87	0.20	22.19		25	148		0.0781	1.0	0.1842	1.2	1.9838	1.5	0.78		1149.7	18.9	1089.9	23.9	1110.0	20.4		2
106B_Z60	4.42	0.32	31.98		39	214		0.0789	0.5	0.1969	1.0	2.1417	1.1	0.89		1169.7	9.9	1158.4	21.1	1162.4	15.3		1
106B_Z32	0.75	0.05	5.60		7	37		0.0790	1.7	0.1891	1.3	2.0584	2.1	0.61		1171.0	33.4	1116.4	26.3	1135.1	28.6		5
106B_Z98	6.49	0.47	46.96		57	314		0.0791	0.5	0.1959	1.3	2.1357	1.4	0.93		1173.4	9.9	1153.5	27.4	1160.4	19.1		2
106B_Z187	5.91	0.43	45.29		52	303		0.0791	0.6	0.1881	1.3	2.0506	1.4	0.92		1173.6	11.0	1111.2	27.1	1132.5	19.5		5
106B_Z206	3.77	0.27	29.16		33	195		0.0791	0.5	0.1901	1.6	2.0733	1.7	0.96		1174.2	9.9	1122.2	33.9	1140.0	23.3		4
106B_Z59	5.63	0.41	39.90		49	267		0.0793	0.5	0.2009	1.0	2.1971	1.2	0.89		1180.6	10.6	1179.9	22.0	1180.1	16.0		0
106B_Z31	0.84	0.06	6.33		7	42		0.0801	1.5	0.1903	1.1	2.1022	1.8	0.60		1200.4	28.9	1122.7	22.4	1149.5	24.8		6
106B_Z57	2.12	0.15	15.73		19	105		0.0802	0.7	0.1917	1.1	2.1205	1.3	0.83		1202.9	14.2	1130.4	21.9	1155.5	17.5		6
106B_Z137	2.14	0.15	17.11		19	114		0.0803	1.5	0.1794	1.1	1.9861	1.9	0.58		1204.4	29.7	1063.6	21.1	1110.8	24.7		12
106B_Z56	2.23	0.16	17.85		20	119		0.0805	0.8	0.1782	1.1	1.9775	1.3	0.81		1208.7	15.2	1057.2	20.8	1107.9	17.6		13
106B_Z204	5.98	0.44	44.23		53	296		0.0806	0.5	0.1935	1.5	2.1495	1.6	0.95		1211.1	9.8	1140.2	31.4	1164.9	21.7		6
106B_Z198	0.30	0.02	2.54		3	17		0.0807	3.6	0.1696	1.8	1.8860	4.0	0.46		1213.3	70.4	1009.7	34.3	1076.2	52.0		17
106B_Z69	1.97	0.15	14.10		17	94		0.0810	0.8	0.1988	1.0	2.2200	1.3	0.77		1221.5	16.5	1168.7	21.6	1187.4	18.2		4
106B_Z33	2.39	0.18	16.56		21	111		0.0814	0.7	0.2011	1.1	2.2554	1.3	0.86		1230.1	13.0	1181.0	24.3	1198.5	18.2		4
106B_Z130	11.40	0.86	75.02		100	501		0.0826	0.5	0.2162	0.9	2.4612	1.1	0.88		1259.3	9.8	1261.5	21.4	1260.7	15.2		0
106B_Z54	4.43	0.35	31.52		39	211		0.0837	2.4	0.2008	1.6	2.3169	2.9	0.55		1285.6	46.9	1179.4	34.2	1217.5	40.1		8
106B_Z113	1.88	0.15	12.91		17	86		0.0844	1.4	0.2074	1.0	2.4130	1.7	0.60		1301.4	26.3	1214.9	22.7	1246.5	24.1		7
106B_Z68	7.27	0.57	46.67		64	312		0.0845	0.5	0.2222	1.2	2.5891	1.3	0.93		1304.5	9.7	1293.4	28.7	1297.6	19.2		1
106B_Z38	2.42	0.19	18.88		21	126		0.0847	1.2	0.1810	1.4	2.1129	1.9	0.78		1307.7	22.6	1072.5	28.4	1153.0	25.2		18
106B_Z157	11.92	0.92	78.62		105	525		0.0850	0.5	0.2149	1.1	2.5174	1.2	0.91		1314.7	9.7	1254.8	24.5	1277.1	17.1		5
106B_Z82	2.02	0.16	12.22		18	82		0.0860	0.7	0.2343	1.2	2.7793	1.4	0.87		1339.3	13.1	1356.7	29.3	1350.0	20.4		-1
106B_Z95	5.29	0.42	32.98		46	220		0.0877	1.3	0.2378	4.7	2.8765	4.9	0.97		1376.2	24.6	1375.5	115.8	1375.8	71.1		0
106B_Z184	6.78	0.54	42.06		60	281		0.0878	0.5	0.2302	1.5	2.7868	1.6	0.95		1378.2	9.6	1335.5	35.9	1352.0	23.2		3
106B_Z210	2.82	0.23	17.27		25	115		0.0878	0.6	0.2353	2.1	2.8494	2.2	0.96		1378.6	11.6	1362.3	51.0	1368.6	32.1		1
106B_Z151	0.55	0.04	4.05		5	27		0.0894	2.0	0.1957	1.2	2.4118	2.4	0.50		1412.3	39.2	1152.2	24.6	1246.1	33.3		18
106B_Z4	4.13	0.34	23.66		36	158		0.0913	0.5	0.2397	1.0	3.0176	1.1	0.89		1452.7	9.5	1385.3	24.6	1412.1	16.7		5
106B_Z45	8.75	0.74	46.84		77	313		0.0921	0.5	0.2657	1.1	3.3760	1.2	0.91		1470.4	9.5	1519.0	29.2	1498.8	18.5		-3
106B_Z109	8.09	0.69	45.55		71	304		0.0928	0.5	0.2515	1.7	3.2199	1.7	0.96		1484.7	9.5	1446.4	43.1	1462.0	26.6		3
106B_Z77	16.33	1.40	90.05		144	602		0.0938	0.5	0.2578	1.2	3.3330	1.3	0.92		1503.5	9.4	1478.5	30.5	1488.8	19.5		2
106B_Z91	19.85	1.72	108.46		174	725		0.0946	0.5	0.2639	1.2	3.4433	1.3	0.92		1520.7	9.4	1509.8	31.4	1514.3	19.8		1
106B_Z150	0.93	0.08	6.78		8	45		0.0947	2.2	0.2015	1.3	2.6305	2.5	0.51		1522.1	41.3	1183.2	27.7	1309.2	36.7		22
106B_Z100	10.16	0.92	63.50		89	424		0.0993	0.5	0.2279	1.2	3.1208	1.3	0.92		1611.7	9.3	1323.2	27.7	1437.8	19.2		18
106B_Z174	4.20	0.39	23.72		37	159		0.1008	0.8	0.2521	1.4	3.5034	1.7	0.87		1639.0	14.9	1449.1	37.4	1528.0	25.8		12
106B_Z208	2.80	0.26	14.37		25	96		0.1010	0.5	0.2798	2.7	3.8971	2.8	0.98		1643.1	9.3	1590.2	76.6	1613.1	43.9		3
106B_Z29	5.96	0.55	29.23		52	195		0.1017	0.5	0.2876	1.1	4.0328	1.2	0.92		1655.2	9.3	1629.6	32.6	1640.8	20.0		2
106B_Z74	4.43	0.42	28.10		39	188		0.1033	0.6	0.2259	1.4	3.2164	1.5	0.92		1683.7	10.6	1312.9	32.6	1461.1	22.8		22
106B_Z127	2.40	0.23	11.86		21	79		0.1038	0.5	0.2904	1.0	4.1540	1.1	0.89		1692.4	9.2	1643.3	28.4	1665.0	17.8		3
106B_Z7	12.82	1.26	57.90		113	387		0.1065	0.5	0.3064	1.3	4.4997	1.3	0.93		1740.7	9.2	1722.9	37.8	1730.9	22.2		1
106B_Z34	9.08	0.91	42.06		80	281		0.1074	0.5	0.3132	1.3	4.6362	1.4	0.93		1755.2	9.1	1756.3	38.7	1755.8	22.4		0
106B_Z35	6.52	0.64	31.40		57	210		0.1074	0.5	0.3001	1.3	4.4453	1.4	0.94		1756.3	9.1	1691.8	39.6	1720.8	23.4		4
106B_Z165	6.09	0.61	30.09		54	201		0.1088	0.5	0.2850	1.1	4.2728	1.2	0.91		1778.6	9.1	1616.3	31.3	1688.1	19.7		9
106B_Z18	8.42	0.85	36.11		74	241		0.1103	0.5	0.3277	1.1	4.9838	1.2	0.91		1804.2	9.1	1827.4	34.1	1816.6	19.8		-1
107B_Z10	5.89	0.60	26.45		52	177		0.1110	0.5	0.3110	1.0	4.7591	1.1	0.89		1815.5	9.1	1745.8	29.6	1777.7	18.1		4
106B_Z116	8.91	0.91	39.00		78	261		0.1120	0.5	0.3261	1.2	5.0332	1.3	0.92		1831.4	9.1	1819.2	37.3	1824.9	21.5		1
106B_Z70	4.81	0.49	22.86		42	153		0.1120	0.5	0.2999	1.1	4.6316	1.2	0.90		1832.2	9.3	1690.8	32.1	1755.0	19.8		8
106B_Z203	10.36	1.07	45.66		91	305		0.1130	0.5	0.3203	1.1	4.9908	1.2	0.91		1848.6	9.0	1791.0	35.3	1817.8	20.7		3
106B_Z188	9.10	0.95	41.43		80	277		0.1141	0.5	0.3152	1.2	4.9570	1.3	0.92		1865.4	9.0	1766.0	36.8	1812.0	21.7		5
106B_Z160	11.35	1.18	48.93		100	327		0.1142	0.5	0.3316	1.2	5.2214	1.3	0.93		1867.4	9.0	1846.0	39.4	1856.1	22.4		1
106B_Z126	6.83	0.72	28.93		60	193		0.1151	0.5	0.3381	1.4	5.3655	1.5	0.94		1881.4	9.0	1877.5	46.4	1879.4	25.6		0
106B_Z15	4.33	0.47	17.64		38	118		0.1172	0.5	0.3472	1.3	5.6111	1.4	0.94		1913.9	9.0	1921.4	44.5	1917.8	24.4		0
106B_Z118	2.20	0.26	10.24		19	68		0.1220	1.1	0.3135	2.1	5.2717	2.4	0.88		1985.2	20.2	1757.8	64.2	1864.3	39.9		11
106B_Z76	0.41	0.05	3.05		4	20		0.1262	4.2	0.1892	1.0	3.2918	4.4	0.24		2045.4	74.7	1117.1	21.2	1479.1	65.6		45
106B_Z73	7.16	0.85	26.99		63	180		0.1303	0.5	0.3823	1.1	6.8662	1.2	0.91		2101.4	8.8	2087.1	39.1	2094.3	21.2		1
106B_Z30	7.42	0.95	48.50		65	324		0.1398	0.5	0.2164	1.6	4.1719	1.7	0.96		2225.0	8.7	1262.8	37.2	1668.5	27.5		43
106B_Z120	0.22	0.03	1.62		2	11		0.1582	10.4	0.1922	2.8	4.1936	10.8	0.26		2436.6	176.2	1133.5	58.1	1672.8	162.9		53
106B_Z61	3.99	0.61	12.07		35	81		0.1683	0.5	0.4838	1.2	11.2264	1.3	0.92		2540.8	8.4	2543.7	50.2	2542.1	23.9		0
106B_Z5	3.81	0.59	11.05		33	74		0.1704	0.5	0.4773	1.0	11.2140	1.1	0.90		2561.6	8.4	2515.4	42.4	2541.1	21.0		2
106B_Z179	12.35	1.94	72.63		108	485		0.1715	0.5	0.2504	1.2	5.9211	1.3	0.93		2572.1	8.4	1440.8	31.4	1964.3	22.6		44
106B_Z155	12.38	1.97	36.43		109	243		0.1742	0.5	0.4855	1.2	11.6653	1.3	0.93		2598.9	8.3	2551.3	51.9	2577.9	24.6		2
106B_Z51	4.90	0.79	14.47		43	97		0.1765	0.5	0.4800	1.2	11.6806	1.3	0.92		2620.3	8.3	2527.1	48.4	2579.1	23.4		4
106B_Z189	9.00	1.50	27.34		79	183		0.1831	0.5	0.4763	1.1	12.0252	1.2	0.91		2681.2	8.3	2511.2	44.9	2606.4	22.1		6
106B_Z142	3.02	0.50	8.56		26	57		0.1839	0.5	0.5039	1.1	12.7787	1.2	0.92		2688.5	8.3	2630.6	49.2	2663.5	23.2		2
106B_Z8	15.44	2.62	40.32		136	269		0.1855	0.5	0.5253	1.2	13.4308	1.3	0.93		2702.2	8.3	2721.4	54.5	2710.4	24.8		-1
106B_Z159	5.54	0.94	16.24		49	109		0.1864	0.5	0.4870	1.8	12.5150	1.8	0.96		2710.3	8.2	2557.9	74.6	2643.9	34.1		6
106B_Z114	3.55	0.61	11.09		31	74		0.1866	0.5	0.4686	1.3	12.0547	1.4	0.94		2712.3	8.2	2477.3	55.2	2608.7	26.6		9
106B_Z183	3.48	0.59	9.66		31	65		0.1869	0.5	0.5129	1.3	13.2146	1.4	0.93		2714.9	8.2	2668.8	57.2	2695.1	26.2		2
106B_Z86	8.05	1.41	21.53		71	144		0.1914	0.5	0.5403	1.3	14.2558	1.4	0.94		2754.0	8.2	2784.5	60.0	2766.9	26.7		-1
106B_Z199	9.40	1.67	30.53		83	204		0.1942	0.5	0.4553	2.0	12.1947	2.0	0.97		2778.5	8.2	2418.9	79.5	2619.5	37.7		13
106B_Z176	5.42	0.96	13.53		48	90		0.1947	1.4	0.5665	2.5	15.2038	2.9	0.86		2781.9	23.7	2893.3	114.3	2828.1	53.2		-4
106B_Z62	2.85	0.51	7.55		25	50		0.1949	0.5	0.5388	1.0	14.4800	1.1	0.89		2784.2	8.2	2778.3	45.0	2781.7	21.0		0
106B_Z153	7.35	1.32	26.65		65	178		0.1966	0.5	0.3968	1.2	10.7555	1.3	0.93		2797.9	8.2	2154.5	45.3	2502.2	24.6		23
106B_Z181	7.55	1.37	19.75		66	132		0.1994	0.5	0.5401	1.1	14.8512	1.2	0.91		2821.5	8.2	2783.8	50.8	2805.8	23.2		1
106B_Z132	9.54	1.76	25.76		84	172		0.2012	0.5	0.5329	0.9	14.7858	1.1	0.88		2836.1	8.2	2753.8	42.0	2801.6	20.1		3
106B_Z52	15.97	3.00	40.45		140	270		0.2081	0.5	0.5642	1.1	16.1906	1.2	0.91		2891.1	8.1	2883.8	50.1	2888.1	22.6		0
106B_Z36	10.62	2.09	30.44		93	203		0.2152	0.6	0.4929	1.5	14.6265	1.6	0.93		2945.3	9.8	2583.1	64.0	2791.3	30.5		12
106B_Z1	14.15	4.19	32.86		124	220		0.3246	0.5	0.5943	1.1	26.5951	1.2	0.90		3591.7	7.7	3006.7	50.7	3368.7	22.7		16
1Accuracy of U concentration is c.20%
2Isotope ratios are not common Pb corrected
3% Discordance is measured as 206Pb/238U age relative to 207Pb/206Pb age for spots >1000 Ma and 206Pb/238U age relative to 207Pb/235U age for spots <1000 Ma
Analyses >10% discordant not used in probability-frequency plots
